# Supplementary material
Source: publisher figshare collection journal article supplement (https://acs.figshare.com/ndownloader/files/5339221)
Supplement: Supplementary file 1 [file 5339221]

  
data_cd27586 
  
_audit_creation_method            SHELXL-97 
_chemical_name_systematic 
; 
 ? 
; 
_chemical_name_common             ? 
_chemical_melting_point           ? 
_chemical_formula_moiety          ? 
_chemical_formula_sum 
 'C19 H16 O3' 
_chemical_formula_weight          292.32 
  
loop_ 
 _atom_type_symbol 
 _atom_type_description 
 _atom_type_scat_dispersion_real 
 _atom_type_scat_dispersion_imag 
 _atom_type_scat_source 
 'C'  'C'   0.0033   0.0016 
 'International Tables Vol C Tables 4.2.6.8 and 6.1.1.4' 
 'H'  'H'   0.0000   0.0000 
 'International Tables Vol C Tables 4.2.6.8 and 6.1.1.4' 
 'O'  'O'   0.0106   0.0060 
 'International Tables Vol C Tables 4.2.6.8 and 6.1.1.4' 
  
_symmetry_cell_setting            Monoclinic 
_symmetry_space_group_name_H-M    P2(1)/c 
  
loop_ 
 _symmetry_equiv_pos_as_xyz 
 'x, y, z' 
 '-x, y+1/2, -z+1/2' 
 '-x, -y, -z' 
 'x, -y-1/2, z-1/2' 
  
_cell_length_a                    10.9030(18) 
_cell_length_b                    16.171(3) 
_cell_length_c                    8.8944(15) 
_cell_angle_alpha                 90.00 
_cell_angle_beta                  109.901(3) 
_cell_angle_gamma                 90.00 
_cell_volume                      1474.6(4) 
_cell_formula_units_Z             4 
_cell_measurement_temperature     293(2) 
_cell_measurement_reflns_used     1496 
_cell_measurement_theta_min       4.704 
_cell_measurement_theta_max       47.605 
  
_exptl_crystal_description        prismatic 
_exptl_crystal_colour             colorless 
_exptl_crystal_size_max           0.428 
_exptl_crystal_size_mid           0.327 
_exptl_crystal_size_min           0.119 
_exptl_crystal_density_meas       ? 
_exptl_crystal_density_diffrn     1.317 
_exptl_crystal_density_method     'not measured' 
_exptl_crystal_F_000              616 
_exptl_absorpt_coefficient_mu     0.088 
_exptl_absorpt_correction_type    empirical 
_exptl_absorpt_correction_T_min   0.8183 
_exptl_absorpt_correction_T_max   1.0000 
_exptl_absorpt_process_details    sadabs 
  
_exptl_special_details 
; 
 ? 
; 
  
_diffrn_ambient_temperature       293(2) 
_diffrn_radiation_wavelength      0.71073 
_diffrn_radiation_type            MoK\a 
_diffrn_radiation_source          'fine-focus sealed tube' 
_diffrn_radiation_monochromator   graphite 
_diffrn_measurement_device_type   'CCD area detector' 
_diffrn_measurement_method        'phi and omega scans' 
_diffrn_detector_area_resol_mean  ? 
_diffrn_standards_number          ? 
_diffrn_standards_interval_count  ? 
_diffrn_standards_interval_time   ? 
_diffrn_standards_decay_%         ? 
_diffrn_reflns_number             8607 
_diffrn_reflns_av_R_equivalents   0.1517 
_diffrn_reflns_av_sigmaI/netI     0.1177 
_diffrn_reflns_limit_h_min        -13 
_diffrn_reflns_limit_h_max        13 
_diffrn_reflns_limit_k_min        -20 
_diffrn_reflns_limit_k_max        20 
_diffrn_reflns_limit_l_min        -10 
_diffrn_reflns_limit_l_max        11 
_diffrn_reflns_theta_min          1.99 
_diffrn_reflns_theta_max          26.99 
_reflns_number_total              3210 
_reflns_number_gt                 1737 
_reflns_threshold_expression      >2sigma(I) 
  
_computing_data_collection        'Bruker SMART' 
_computing_cell_refinement        'Bruker SMART' 
_computing_data_reduction         'Bruker SHELXTL' 
_computing_structure_solution     'SHELXS-97 (Sheldrick, 1990)' 
_computing_structure_refinement   'SHELXL-97 (Sheldrick, 1997)' 
_computing_molecular_graphics     'Bruker SHELXTL' 
_computing_publication_material   'Bruker SHELXTL' 
  
_refine_special_details 
; 
 Refinement of F^2^ against ALL reflections.  The weighted R-factor wR and 
 goodness of fit S are based on F^2^, conventional R-factors R are based 
 on F, with F set to zero for negative F^2^. The threshold expression of 
 F^2^ > 2sigma(F^2^) is used only for calculating R-factors(gt) etc. and is 
 not relevant to the choice of reflections for refinement.  R-factors based 
 on F^2^ are statistically about twice as large as those based on F, and R- 
 factors based on ALL data will be even larger. 
; 
  
_refine_ls_structure_factor_coef  Fsqd 
_refine_ls_matrix_type            full 
_refine_ls_weighting_scheme       calc 
_refine_ls_weighting_details 
 'calc w=1/[\s^2^(Fo^2^)+(0.0407P)^2^+0.0000P] where P=(Fo^2^+2Fc^2^)/3' 
_atom_sites_solution_primary      direct 
_atom_sites_solution_secondary    difmap 
_atom_sites_solution_hydrogens    geom 
_refine_ls_hydrogen_treatment     constr 
_refine_ls_extinction_method      SHELXL 
_refine_ls_extinction_coef        0.0152(19) 
_refine_ls_extinction_expression 
 'Fc^*^=kFc[1+0.001xFc^2^\l^3^/sin(2\q)]^-1/4^' 
_refine_ls_number_reflns          3210 
_refine_ls_number_parameters      202 
_refine_ls_number_restraints      0 
_refine_ls_R_factor_all           0.1004 
_refine_ls_R_factor_gt            0.0605 
_refine_ls_wR_factor_ref          0.1397 
_refine_ls_wR_factor_gt           0.1253 
_refine_ls_goodness_of_fit_ref    0.882 
_refine_ls_restrained_S_all       0.882 
_refine_ls_shift/su_max           0.001 
_refine_ls_shift/su_mean          0.000 
  
loop_ 
 _atom_site_label 
 _atom_site_type_symbol 
 _atom_site_fract_x 
 _atom_site_fract_y 
 _atom_site_fract_z 
 _atom_site_U_iso_or_equiv 
 _atom_site_adp_type 
 _atom_site_occupancy 
 _atom_site_symmetry_multiplicity 
 _atom_site_calc_flag 
 _atom_site_refinement_flags 
 _atom_site_disorder_assembly 
 _atom_site_disorder_group 
O1 O 1.10950(16) 1.17481(10) 0.81553(18) 0.0685(5) Uani 1 1 d . . . 
O2 O 0.97025(13) 1.07202(9) 0.74181(14) 0.0493(4) Uani 1 1 d . . . 
O3 O 0.66518(16) 0.86617(10) 0.64882(16) 0.0627(5) Uani 1 1 d . . . 
C1 C 1.0329(2) 1.13876(14) 0.7036(3) 0.0500(6) Uani 1 1 d . . . 
C2 C 0.9987(2) 1.15722(13) 0.5388(2) 0.0496(6) Uani 1 1 d . . . 
H2 H 1.0435 1.1997 0.5096 0.060 Uiso 1 1 calc R . . 
C3 C 0.9053(2) 1.11711(13) 0.4212(2) 0.0440(5) Uani 1 1 d . . . 
C4 C 0.83193(18) 1.05114(12) 0.4634(2) 0.0393(5) Uani 1 1 d . . . 
C5 C 0.87290(19) 1.03010(13) 0.6256(2) 0.0410(5) Uani 1 1 d . . . 
C6 C 0.8157(2) 0.96806(13) 0.6845(2) 0.0431(5) Uani 1 1 d . . . 
C7 C 0.7163(2) 0.92470(13) 0.5782(2) 0.0441(5) Uani 1 1 d . . . 
C8 C 0.6679(2) 0.94099(13) 0.4149(2) 0.0415(5) Uani 1 1 d . . . 
C9 C 0.7243(2) 1.00510(13) 0.3568(2) 0.0431(5) Uani 1 1 d . . . 
C10 C 0.8340(2) 0.93858(15) 0.8507(2) 0.0602(7) Uani 1 1 d . . . 
H10A H 0.8116 0.9813 0.9135 0.072 Uiso 1 1 calc R . . 
H10B H 0.9229 0.9204 0.9055 0.072 Uiso 1 1 calc R . . 
C11 C 0.7388(3) 0.86674(18) 0.8177(3) 0.0770(8) Uani 1 1 d . . . 
H11A H 0.7858 0.8151 0.8488 0.092 Uiso 1 1 calc R . . 
H11B H 0.6806 0.8732 0.8786 0.092 Uiso 1 1 calc R . . 
C12 C 0.55814(19) 0.88882(12) 0.3108(2) 0.0409(5) Uani 1 1 d . . . 
C13 C 0.4359(2) 0.89274(14) 0.3258(2) 0.0538(6) Uani 1 1 d . . . 
H13 H 0.4213 0.9293 0.3986 0.065 Uiso 1 1 calc R . . 
C14 C 0.3361(2) 0.84328(15) 0.2344(3) 0.0589(6) Uani 1 1 d . . . 
H14 H 0.2547 0.8466 0.2462 0.071 Uiso 1 1 calc R . . 
C15 C 0.3548(2) 0.78968(14) 0.1273(2) 0.0570(6) Uani 1 1 d . . . 
H15 H 0.2867 0.7563 0.0660 0.068 Uiso 1 1 calc R . . 
C16 C 0.4749(2) 0.78495(15) 0.1096(3) 0.0649(7) Uani 1 1 d . . . 
H16 H 0.4882 0.7484 0.0359 0.078 Uiso 1 1 calc R . . 
C17 C 0.5758(2) 0.83440(15) 0.2011(2) 0.0585(6) Uani 1 1 d . . . 
H17 H 0.6569 0.8309 0.1885 0.070 Uiso 1 1 calc R . . 
C18 C 0.8857(2) 1.14375(15) 0.2527(2) 0.0636(7) Uani 1 1 d . . . 
H18A H 0.8035 1.1717 0.2093 0.095 Uiso 1 1 calc R . . 
H18B H 0.8863 1.0960 0.1888 0.095 Uiso 1 1 calc R . . 
H18C H 0.9548 1.1805 0.2526 0.095 Uiso 1 1 calc R . . 
C19 C 0.6623(3) 1.02757(17) 0.1825(2) 0.0718(8) Uani 1 1 d . . . 
H19A H 0.7178 1.0098 0.1249 0.108 Uiso 1 1 calc R . . 
H19B H 0.6507 1.0864 0.1724 0.108 Uiso 1 1 calc R . . 
H19C H 0.5791 1.0008 0.1394 0.108 Uiso 1 1 calc R . . 
  
loop_ 
 _atom_site_aniso_label 
 _atom_site_aniso_U_11 
 _atom_site_aniso_U_22 
 _atom_site_aniso_U_33 
 _atom_site_aniso_U_23 
 _atom_site_aniso_U_13 
 _atom_site_aniso_U_12 
O1 0.0592(11) 0.0711(13) 0.0623(11) -0.0116(8) 0.0038(8) -0.0214(9) 
O2 0.0441(9) 0.0517(10) 0.0427(8) -0.0043(7) 0.0025(7) -0.0071(7) 
O3 0.0683(11) 0.0613(11) 0.0477(9) 0.0085(7) 0.0059(8) -0.0187(9) 
C1 0.0418(13) 0.0469(14) 0.0559(14) -0.0083(11) 0.0095(11) -0.0018(11) 
C2 0.0477(14) 0.0434(14) 0.0545(14) 0.0010(10) 0.0132(11) -0.0018(10) 
C3 0.0459(12) 0.0365(12) 0.0459(12) 0.0004(9) 0.0106(10) 0.0045(10) 
C4 0.0410(12) 0.0345(11) 0.0383(11) -0.0014(8) 0.0083(9) 0.0051(9) 
C5 0.0375(11) 0.0403(13) 0.0383(11) -0.0054(9) 0.0040(9) 0.0026(9) 
C6 0.0437(12) 0.0449(13) 0.0341(11) 0.0004(9) 0.0047(9) 0.0024(10) 
C7 0.0464(12) 0.0405(13) 0.0416(12) 0.0025(9) 0.0103(10) 0.0008(10) 
C8 0.0410(12) 0.0400(13) 0.0376(11) -0.0022(9) 0.0056(9) 0.0047(9) 
C9 0.0432(13) 0.0411(13) 0.0390(11) -0.0010(9) 0.0065(10) 0.0043(10) 
C10 0.0607(15) 0.0671(18) 0.0465(13) 0.0047(11) 0.0102(11) -0.0127(13) 
C11 0.088(2) 0.083(2) 0.0436(14) 0.0131(12) 0.0015(13) -0.0297(16) 
C12 0.0415(12) 0.0351(12) 0.0376(11) -0.0005(8) 0.0023(9) 0.0037(9) 
C13 0.0480(14) 0.0497(15) 0.0591(14) -0.0099(10) 0.0122(11) 0.0041(11) 
C14 0.0424(14) 0.0620(17) 0.0650(15) -0.0052(12) 0.0088(12) -0.0027(12) 
C15 0.0504(15) 0.0427(14) 0.0599(14) -0.0013(11) -0.0047(11) -0.0038(11) 
C16 0.0589(16) 0.0556(16) 0.0677(16) -0.0258(12) 0.0054(13) 0.0033(13) 
C17 0.0449(14) 0.0617(17) 0.0628(15) -0.0168(12) 0.0104(12) 0.0055(11) 
C18 0.0699(17) 0.0564(16) 0.0583(15) 0.0106(11) 0.0137(12) -0.0128(13) 
C19 0.0746(18) 0.078(2) 0.0451(14) 0.0087(11) -0.0033(12) -0.0205(15) 
  
_geom_special_details 
; 
 All esds (except the esd in the dihedral angle between two l.s. planes) 
 are estimated using the full covariance matrix.  The cell esds are taken 
 into account individually in the estimation of esds in distances, angles 
 and torsion angles; correlations between esds in cell parameters are only 
 used when they are defined by crystal symmetry.  An approximate (isotropic) 
 treatment of cell esds is used for estimating esds involving l.s. planes. 
; 
  
loop_ 
 _geom_bond_atom_site_label_1 
 _geom_bond_atom_site_label_2 
 _geom_bond_distance 
 _geom_bond_site_symmetry_2 
 _geom_bond_publ_flag 
O1 C1 1.209(2) . ? 
O2 C1 1.380(3) . ? 
O2 C5 1.381(2) . ? 
O3 C7 1.356(2) . ? 
O3 C11 1.442(2) . ? 
C1 C2 1.416(3) . ? 
C2 C3 1.352(3) . ? 
C2 H2 0.9300 . ? 
C3 C4 1.457(3) . ? 
C3 C18 1.503(3) . ? 
C4 C5 1.399(2) . ? 
C4 C9 1.440(3) . ? 
C5 C6 1.376(3) . ? 
C6 C7 1.365(3) . ? 
C6 C10 1.500(3) . ? 
C7 C8 1.392(2) . ? 
C8 C9 1.391(3) . ? 
C8 C12 1.499(3) . ? 
C9 C19 1.509(3) . ? 
C10 C11 1.518(3) . ? 
C10 H10A 0.9700 . ? 
C10 H10B 0.9700 . ? 
C11 H11A 0.9700 . ? 
C11 H11B 0.9700 . ? 
C12 C17 1.375(3) . ? 
C12 C13 1.385(3) . ? 
C13 C14 1.372(3) . ? 
C13 H13 0.9300 . ? 
C14 C15 1.354(3) . ? 
C14 H14 0.9300 . ? 
C15 C16 1.373(3) . ? 
C15 H15 0.9300 . ? 
C16 C17 1.379(3) . ? 
C16 H16 0.9300 . ? 
C17 H17 0.9300 . ? 
C18 H18A 0.9600 . ? 
C18 H18B 0.9600 . ? 
C18 H18C 0.9600 . ? 
C19 H19A 0.9600 . ? 
C19 H19B 0.9600 . ? 
C19 H19C 0.9600 . ? 
  
loop_ 
 _geom_angle_atom_site_label_1 
 _geom_angle_atom_site_label_2 
 _geom_angle_atom_site_label_3 
 _geom_angle 
 _geom_angle_site_symmetry_1 
 _geom_angle_site_symmetry_3 
 _geom_angle_publ_flag 
C1 O2 C5 121.20(16) . . ? 
C7 O3 C11 107.88(16) . . ? 
O1 C1 O2 115.8(2) . . ? 
O1 C1 C2 128.0(2) . . ? 
O2 C1 C2 116.24(18) . . ? 
C3 C2 C1 124.3(2) . . ? 
C3 C2 H2 117.9 . . ? 
C1 C2 H2 117.9 . . ? 
C2 C3 C4 119.14(18) . . ? 
C2 C3 C18 116.6(2) . . ? 
C4 C3 C18 124.23(18) . . ? 
C5 C4 C9 117.12(19) . . ? 
C5 C4 C3 115.66(17) . . ? 
C9 C4 C3 127.21(17) . . ? 
C6 C5 O2 113.91(17) . . ? 
C6 C5 C4 122.90(18) . . ? 
O2 C5 C4 123.14(19) . . ? 
C7 C6 C5 117.82(18) . . ? 
C7 C6 C10 109.1(2) . . ? 
C5 C6 C10 132.96(18) . . ? 
O3 C7 C6 113.10(17) . . ? 
O3 C7 C8 123.09(18) . . ? 
C6 C7 C8 123.7(2) . . ? 
C9 C8 C7 118.04(18) . . ? 
C9 C8 C12 123.44(17) . . ? 
C7 C8 C12 118.52(19) . . ? 
C8 C9 C4 120.33(17) . . ? 
C8 C9 C19 117.43(18) . . ? 
C4 C9 C19 122.10(19) . . ? 
C6 C10 C11 101.52(16) . . ? 
C6 C10 H10A 111.5 . . ? 
C11 C10 H10A 111.5 . . ? 
C6 C10 H10B 111.5 . . ? 
C11 C10 H10B 111.5 . . ? 
H10A C10 H10B 109.3 . . ? 
O3 C11 C10 107.92(17) . . ? 
O3 C11 H11A 110.1 . . ? 
C10 C11 H11A 110.1 . . ? 
O3 C11 H11B 110.1 . . ? 
C10 C11 H11B 110.1 . . ? 
H11A C11 H11B 108.4 . . ? 
C17 C12 C13 117.98(19) . . ? 
C17 C12 C8 121.55(19) . . ? 
C13 C12 C8 120.45(18) . . ? 
C14 C13 C12 120.8(2) . . ? 
C14 C13 H13 119.6 . . ? 
C12 C13 H13 119.6 . . ? 
C15 C14 C13 120.7(2) . . ? 
C15 C14 H14 119.6 . . ? 
C13 C14 H14 119.6 . . ? 
C14 C15 C16 119.6(2) . . ? 
C14 C15 H15 120.2 . . ? 
C16 C15 H15 120.2 . . ? 
C15 C16 C17 120.0(2) . . ? 
C15 C16 H16 120.0 . . ? 
C17 C16 H16 120.0 . . ? 
C12 C17 C16 120.9(2) . . ? 
C12 C17 H17 119.6 . . ? 
C16 C17 H17 119.6 . . ? 
C3 C18 H18A 109.5 . . ? 
C3 C18 H18B 109.5 . . ? 
H18A C18 H18B 109.5 . . ? 
C3 C18 H18C 109.5 . . ? 
H18A C18 H18C 109.5 . . ? 
H18B C18 H18C 109.5 . . ? 
C9 C19 H19A 109.5 . . ? 
C9 C19 H19B 109.5 . . ? 
H19A C19 H19B 109.5 . . ? 
C9 C19 H19C 109.5 . . ? 
H19A C19 H19C 109.5 . . ? 
H19B C19 H19C 109.5 . . ? 
  
loop_ 
 _geom_torsion_atom_site_label_1 
 _geom_torsion_atom_site_label_2 
 _geom_torsion_atom_site_label_3 
 _geom_torsion_atom_site_label_4 
 _geom_torsion 
 _geom_torsion_site_symmetry_1 
 _geom_torsion_site_symmetry_2 
 _geom_torsion_site_symmetry_3 
 _geom_torsion_site_symmetry_4 
 _geom_torsion_publ_flag 
C5 O2 C1 O1 174.62(18) . . . . ? 
C5 O2 C1 C2 -4.7(3) . . . . ? 
O1 C1 C2 C3 -175.3(2) . . . . ? 
O2 C1 C2 C3 3.9(3) . . . . ? 
C1 C2 C3 C4 1.0(3) . . . . ? 
C1 C2 C3 C18 -178.18(19) . . . . ? 
C2 C3 C4 C5 -5.0(3) . . . . ? 
C18 C3 C4 C5 174.09(19) . . . . ? 
C2 C3 C4 C9 175.91(19) . . . . ? 
C18 C3 C4 C9 -5.0(3) . . . . ? 
C1 O2 C5 C6 -176.66(19) . . . . ? 
C1 O2 C5 C4 0.6(3) . . . . ? 
C9 C4 C5 C6 0.5(3) . . . . ? 
C3 C4 C5 C6 -178.65(19) . . . . ? 
C9 C4 C5 O2 -176.49(17) . . . . ? 
C3 C4 C5 O2 4.4(3) . . . . ? 
O2 C5 C6 C7 178.46(17) . . . . ? 
C4 C5 C6 C7 1.2(3) . . . . ? 
O2 C5 C6 C10 2.8(3) . . . . ? 
C4 C5 C6 C10 -174.5(2) . . . . ? 
C11 O3 C7 C6 -2.5(3) . . . . ? 
C11 O3 C7 C8 -179.7(2) . . . . ? 
C5 C6 C7 O3 -178.82(18) . . . . ? 
C10 C6 C7 O3 -2.2(3) . . . . ? 
C5 C6 C7 C8 -1.5(3) . . . . ? 
C10 C6 C7 C8 175.12(19) . . . . ? 
O3 C7 C8 C9 177.08(19) . . . . ? 
C6 C7 C8 C9 0.1(3) . . . . ? 
O3 C7 C8 C12 -2.9(3) . . . . ? 
C6 C7 C8 C12 -179.9(2) . . . . ? 
C7 C8 C9 C4 1.7(3) . . . . ? 
C12 C8 C9 C4 -178.26(18) . . . . ? 
C7 C8 C9 C19 -174.10(19) . . . . ? 
C12 C8 C9 C19 5.9(3) . . . . ? 
C5 C4 C9 C8 -2.0(3) . . . . ? 
C3 C4 C9 C8 177.0(2) . . . . ? 
C5 C4 C9 C19 173.6(2) . . . . ? 
C3 C4 C9 C19 -7.3(3) . . . . ? 
C7 C6 C10 C11 5.4(3) . . . . ? 
C5 C6 C10 C11 -178.6(2) . . . . ? 
C7 O3 C11 C10 6.0(3) . . . . ? 
C6 C10 C11 O3 -6.8(3) . . . . ? 
C9 C8 C12 C17 68.5(3) . . . . ? 
C7 C8 C12 C17 -111.5(2) . . . . ? 
C9 C8 C12 C13 -113.2(2) . . . . ? 
C7 C8 C12 C13 66.8(3) . . . . ? 
C17 C12 C13 C14 0.4(3) . . . . ? 
C8 C12 C13 C14 -178.0(2) . . . . ? 
C12 C13 C14 C15 -0.2(3) . . . . ? 
C13 C14 C15 C16 -0.2(4) . . . . ? 
C14 C15 C16 C17 0.2(4) . . . . ? 
C13 C12 C17 C16 -0.4(3) . . . . ? 
C8 C12 C17 C16 178.0(2) . . . . ? 
C15 C16 C17 C12 0.0(4) . . . . ? 
  
_diffrn_measured_fraction_theta_max    0.995 
_diffrn_reflns_theta_full              26.99 
_diffrn_measured_fraction_theta_full   0.995 
_refine_diff_density_max    0.236 
_refine_diff_density_min   -0.205 
_refine_diff_density_rms    0.052 
  
